# Supplementary material for: A Qualitative Study Exploring Professional Perspectives of a Challenging Rehabilitation Environment for Geriatric Rehabilitation
Source: J Clin Med. 2023 Feb 3;12(3):1231. doi: 10.3390/jcm12031231 (PMC9918066; doi:10.3390/jcm12031231)
Supplement: Supplementary file 1 [file jcm-12-01231-s001.zip › jcm-2106121-supplementary.pdf]

Supplemental Table S1

**COREQ (Consolidated criteria for Reporting Qualitative research) Checklist**

| Topic                                          | Item No. | Guide Questions/Description                                                                                                                               | Reported online No.   |
|------------------------------------------------|----------|-----------------------------------------------------------------------------------------------------------------------------------------------------------|-----------------------|
| <b>Domain 1: Research team and reflexivity</b> |          |                                                                                                                                                           |                       |
| <i>Personal characteristics</i>                |          |                                                                                                                                                           |                       |
| Interviewer/facilitator                        | 1        | Which author/s conducted the interview or focus group?                                                                                                    | 124                   |
| Credentials                                    | 2        | What were the researcher's credentials? E.g. PhD, MD                                                                                                      | 124-128               |
| Occupation                                     | 3        | What was their occupation at the time of the study?                                                                                                       | 124-128               |
| Gender                                         | 4        | Was the researcher male or female?                                                                                                                        | 124-128               |
| Experience and training                        | 5        | What experience or training did the researcher have?                                                                                                      | 124-128               |
| <i>Relationship with participants</i>          |          |                                                                                                                                                           |                       |
| Relationship established                       | 6        | Was a relationship established prior to study commencement?                                                                                               | 138-139<br>150-152    |
| Participant knowledge of the interviewer       | 7        | What did the participants know about the researcher? E.g., personal goals, reasons for doing the research                                                 | 138-139               |
| Interviewer characteristics                    | 8        | What characteristics were reported about the interviewer/facilitator? E.g., bias, assumptions, reasons and interests in the research topic                | 124-128               |
| <b>Domain 2: Study design</b>                  |          |                                                                                                                                                           |                       |
| <i>Theoretical framework</i>                   |          |                                                                                                                                                           |                       |
| Methodological orientation and Theory          | 9        | What methodological orientation was stated to underpin the study? E.g., grounded theory, discourse analysis, ethnography, phenomenology, content analysis | 79-84                 |
| <i>Participant selection</i>                   |          |                                                                                                                                                           |                       |
| Sampling                                       | 10       | How were participants selected? E.g., purposive, convenience, consecutive, snowball                                                                       | 90-121                |
| Method of approach                             | 11       | How were participants approached? E.g., face-to-face, telephone, mail, email                                                                              | 90-121                |
| Sample size                                    | 12       | How many participants were in the study?                                                                                                                  | 174-176               |
| Non-participation                              | 13       | How many people refused to participate or dropped out? Reasons?                                                                                           | 176-180               |
| <i>Setting</i>                                 |          |                                                                                                                                                           |                       |
| Setting of data collection                     | 14       | Where was the data collected? E.g., home, clinic, workplace                                                                                               | 133-137<br>149-150    |
| Presence of non-participants                   | 15       | Was anyone else present besides the participants and researchers?                                                                                         | 137                   |
| Description of sample                          | 16       | What are the important characteristics of the sample? E.g., demographic data, date                                                                        | Table 1               |
| <i>Data collection</i>                         |          |                                                                                                                                                           |                       |
| Interview guide                                | 17       | Were questions, prompts, guides provided by the authors? Was it pilot tested?                                                                             | 129-132<br>Appendix 1 |
| Repeat interviews                              | 18       | Were repeat interviews carried out? If yes, how many?                                                                                                     | 113-115<br>174-176    |
| Audio/visual recording                         | 19       | Did the research use audio or visual recording to collect the data?                                                                                       | 144-145<br>154-156    |

|                                        |    |                                                                                                                                  |                             |
|----------------------------------------|----|----------------------------------------------------------------------------------------------------------------------------------|-----------------------------|
| Field notes                            | 20 | Were field notes made during and/or after the interview or focus group?                                                          | 124                         |
| Duration                               | 21 | What was the duration of the interviews or focus group?                                                                          | 144<br>149                  |
| Data saturation                        | 22 | Was data saturation discussed?                                                                                                   | 113-115                     |
| Transcripts returned                   | 23 | Were transcripts returned to participants for comment and/or correction?                                                         | 145-147                     |
| <b>Domain 3: analysis and findings</b> |    |                                                                                                                                  |                             |
| <i>Data analysis</i>                   |    |                                                                                                                                  |                             |
| Number of data coders                  | 24 | How many data coders coded the data?                                                                                             | 158-164                     |
| Description of the coding tree         | 25 | Did authors provide a description of the coding tree?                                                                            | 158-171                     |
| Derivation of themes                   | 26 | Were themes identified in advance or derived from the data?                                                                      | 158-171                     |
| Software                               | 27 | What software, if applicable, was used to manage the data?                                                                       | 159                         |
| Participant checking                   | 28 | Did participants provide feedback on the findings?                                                                               | 145-147                     |
| <i>Reporting</i>                       |    |                                                                                                                                  |                             |
| Quotations presented                   | 29 | Were participant quotations presented to illustrate the themes/findings? Was each quotation identified? E.g., participant number | 199-338                     |
| Data and findings consistent           | 30 | Was there consistency between the data presented and the findings?                                                               | 199-338<br>Table 2<br>and 3 |
| Clarity of major themes                | 31 | Were major themes clearly presented in the findings?                                                                             | 199-338<br>Table 2<br>and 3 |
| Clarity of minor themes                | 32 | Is there a description of diverse cases or discussion of minor themes?                                                           | 199-338<br>Table 2<br>and 3 |
